# Supplementary material for: Hydroacid complexes: a new class of draw solutes to promote forward osmosis (FO) processes
Source: Royal Society of Chemistry journal article supplement (doi:10.1039/c3cc43951h), 2013-01-01
Supplement: c3cc43951h.pdf [file c3cc43951h.pdf]

## Supporting Information

### Experimental section

#### Starting materials

$\text{Fe}(\text{NO}_3)_3 \cdot 9\text{H}_2\text{O}$  (99%),  $\text{Cu}(\text{NO}_3)_2 \cdot 3\text{H}_2\text{O}$  (99%), citric acid (99%), malic acid (99%) and tartaric acid (99%) were purchased from Sigma-Aldrich. NaOH (99%) and NaCl (99.5%) were supplied by Merck. Ethanol (99%) was obtained from Acros Organics. All the chemicals above were used as received. DI water from a Milli-Q (Millipore, USA) system was used in all experiments.

#### Synthesis of complexes

**$\text{Na}_5[\text{Fe}(\text{C}_6\text{H}_4\text{O}_7)_2]$  (Fe-CA)**  $\text{Fe}(\text{NO}_3)_3 \cdot 9\text{H}_2\text{O}$  (10 mmol, 4 g) and citric acid (20 mmol, 3.84 g) in DI water (30 mL) were stirred overnight at 50 °C. Then NaOH (1.0 M) was added stepwise to pH ~ 8. The resultant solution was stirred further for 3 h and then concentrated to ~10 mL under vacuum. Cold ethanol was added to precipitate the product. It was then purified 3 times from  $\text{H}_2\text{O}/\text{EtOH}$ . The resultant yellow solid  $\text{Na}_5[\text{Fe}(\text{C}_6\text{H}_4\text{O}_7)_2] \cdot 2\text{H}_2\text{O}$  was dried under vacuum (yield > 95%) and ready for characterization and performance tests. Elemental analysis: calcd: C 24.7, H 2.1, O 43.9%; found: C 25.1, H 2.0, O 43.5%.

The synthesis procedures of **Cu-CA**, **Cu-MA**, **Fe-MA**, **Cu-TA** and **Fe-TA** are similar to those of **Fe-CA**. Calcd for **Cu-CA** ( $\text{Na}_2[\text{Cu}(\text{C}_6\text{H}_4\text{O}_7)(\text{H}_2\text{O})]$ ): C 22.8, H 1.9, O 40.6%; found: C 23.1, H 1.8, O 40.2%. Calcd for **Cu-MA** ( $\text{Na}[\text{CuC}_4\text{H}_3\text{O}_5](\text{H}_2\text{O})$ ): C 20.4, H 2.1, O 40.8%; found: C 20.7, H 1.9, O 40.2%. Calcd for **Fe-MA** ( $\text{Na}_3[\text{Fe}(\text{C}_4\text{H}_3\text{O}_5)_2] \cdot \text{H}_2\text{O}$ ): C 23.7, H 2.0, O 43.5%; found: C 24.0, H 1.9, O 43.3%. Calcd for **Cu-TA** ( $\text{CuC}_4\text{H}_4\text{O}_6$ ): C

22.7, H 1.9, O 45.4%; found: C 23.1, H 1.9, O 45.2%. Calcd for **Fe-TA** ( $\text{Na}_3[\text{Fe}(\text{C}_4\text{H}_3\text{O}_6)_2]$ ): C 22.9, H 1.4, O 45.8%; found: C 23.3, H 1.3, O 45.5%.

### Characterization of complexes

FTIR measurements were conducted through a Perkin-Elmer FT-IR Spectrometer Spectrum 2000 in the range of 4000 to 400  $\text{cm}^{-1}$  to determine the functional groups of complexes. The spectra were obtained by the solid KBr method. The weight loss of complexes was measured by TGA with a TGA 2050 thermogravimetric analyzer (TA Instruments, New Castle, DE) during thermal oxidation. The measurement was conducted under air from 30 to 600  $^{\circ}\text{C}$  at a heating rate of 10  $^{\circ}\text{C}/\text{min}$ .

### Relative viscosity of the complex solutions

The relative viscosity of the complex solutions,  $\eta_r$ , compared to DI water is calculated using equation (1):

$$\eta_r = \frac{\eta}{\eta_0} = \frac{t\rho}{t_0\rho_0} \quad (1)$$

where  $t$  (s) is the elution time of the complex solution measured by a AVS 360 inherent viscosity meter,  $\rho$  ( $\text{g}\cdot\text{mL}^{-1}$ ) is the density of the complex solution measured by a DMA 35 portable density meter, and  $t_0$  (s) and  $\rho_0$  ( $\text{g}\cdot\text{mL}^{-1}$ ) are the elution time and density of DI water, respectively.

### FO process

FO experiments were carried out through a lab-scale circulating set-up as depicted elsewhere.<sup>1,2</sup> Commercial HTI flat sheet membranes (Batch No. 060327-3, Hydration Technologies Inc., OR, USA) and self-made hollow fiber membranes made of cellulose acetate (CA)<sup>3</sup> were used in FO. For the flat sheet membranes, a crossflow permeation cell was designed in frame configuration with a rectangular channel on both sides of the

membrane. Feed and draw solutions flowed co-currently through their respective cell channels at the velocity of  $6.4 \text{ cm}\cdot\text{s}^{-1}$ . For the hollow fiber membrane measurement, the flow velocities were  $10 \text{ mL}\cdot\text{min}^{-1}$  and  $300 \text{ mL}\cdot\text{min}^{-1}$  at the lumen and shell sides, respectively. The temperatures of both the feed and draw solutions were maintained at  $25 \pm 0.5 \text{ }^{\circ}\text{C}$ . Draw solutions were prepared from synthesized complexes. DI water was used as the feed solution and operated under the pressure retarded osmosis (PRO) (draw solution against the selective layer of membrane) mode unless otherwise stated. The water flux,  $J_v$ , ( $\text{L}\cdot\text{m}^{-2}\cdot\text{hr}^{-1}$ , abbreviated as LMH) is calculated from the volume change of the feed solution using equation (2).

$$J_v = \Delta V / (A \Delta t) \quad (2)$$

where  $\Delta V$  (L) is the volume change of the feed solution over a predetermined time  $\Delta t$  (hr) and  $A$  is the effective membrane surface area ( $\text{m}^2$ ). The reverse solute flux,  $J_s$  (gMH), in FO refers to the draw solute permeating from the draw solution to the feed side. Since the complexes dissociate and are conductive in their aqueous solutions, the concentration of draw solutes permeating to the feed solution was obtained through the conversion of its electrical conductivity measured using a calibrated conductivity meter (Oakton Instruments, Vernon Hills, IL). The value of  $J_s$  was determined from the increase in the feed conductivity:

$$J_s = \frac{(C_t V_t) - (C_0 V_0)}{\Delta t} \frac{1}{A_m} \quad (3)$$

where  $C_0$  ( $\text{mol}\cdot\text{L}^{-1}$ ) and  $V_0$  (L) are the initial salt concentration and the initial volume of the feed, respectively, while  $C_t$  ( $\text{mol}\cdot\text{L}^{-1}$ ) and  $V_t$  (L) are the salt concentration and the volume of the feed over a predetermined time  $\Delta t$  (h), respectively.

The pH values of draw solutions were determined using a pH meter (Horiba pH meter D-54, Japan). The draw solution osmotic pressure of complex was measured using a model 3250 osmometer (Advanced Instruments, Inc.).

### Regeneration of complex draw solutes

After the FO test, the diluted complex solution was re-concentrated through a pressure-driven process. A thin-film polyamide NF membrane (NE2540-70) was used for the Fe-CA regeneration under a gas pressure of 10-bar. When using DI water as the feed, the pure water permeability of the NF membrane was 16.8 LMH/bar calculated by equation (2) under 10-bar. The salt rejection of the system gives an indication of the percentage of the draw solute that is retained by the membrane and is calculated by equation (4):

$$R = (1 - \frac{C_P}{C_F}) \times 100\% \quad (4)$$

where  $R$  is the salt rejection,  $C_P$  ( $\text{mol} \cdot \text{L}^{-1}$ ) is the solute concentration in the permeate, and  $C_F$  ( $\text{mol} \cdot \text{L}^{-1}$ ) is the solute concentration in the feed solution.

**Table S1** Structures and molecules of hydroacid complexes and their precursors

|                |                                                                                                                                                                               |                                                                                                                                                                        |                                                                                                                                       |
|----------------|-------------------------------------------------------------------------------------------------------------------------------------------------------------------------------|------------------------------------------------------------------------------------------------------------------------------------------------------------------------|---------------------------------------------------------------------------------------------------------------------------------------|
| Hydroxy acid   | 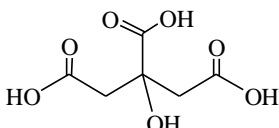<br>Citric acid (CA)                                                                       | <br>Malic acid (MA)                                                                | <br>Tartaric acid (TA)                           |
| Cupric complex | <br>Cu-CA ( $\text{Na}_2[\text{Cu}(\text{C}_6\text{H}_4\text{O}_7)(\text{H}_2\text{O})]$ ) | <br>Cu-MA<br>( $\text{Na}[\text{CuC}_4\text{H}_3\text{O}_5](\text{H}_2\text{O})$ ) | <br>Cu-TA ( $\text{CuC}_4\text{H}_4\text{O}_6$ ) |

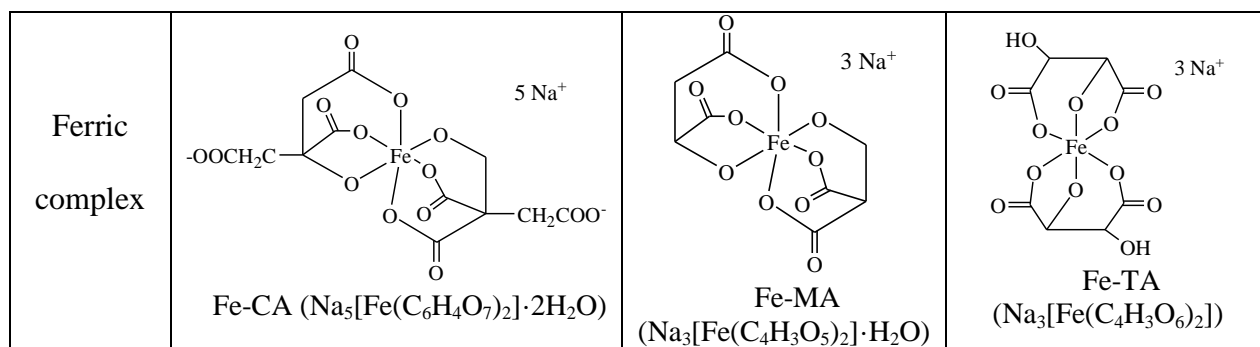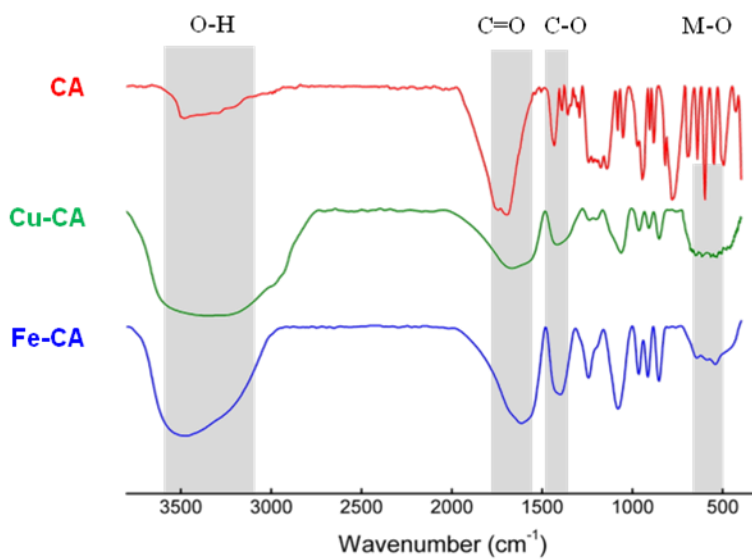

**Fig. S1** FTIR spectra of CA and its complexes

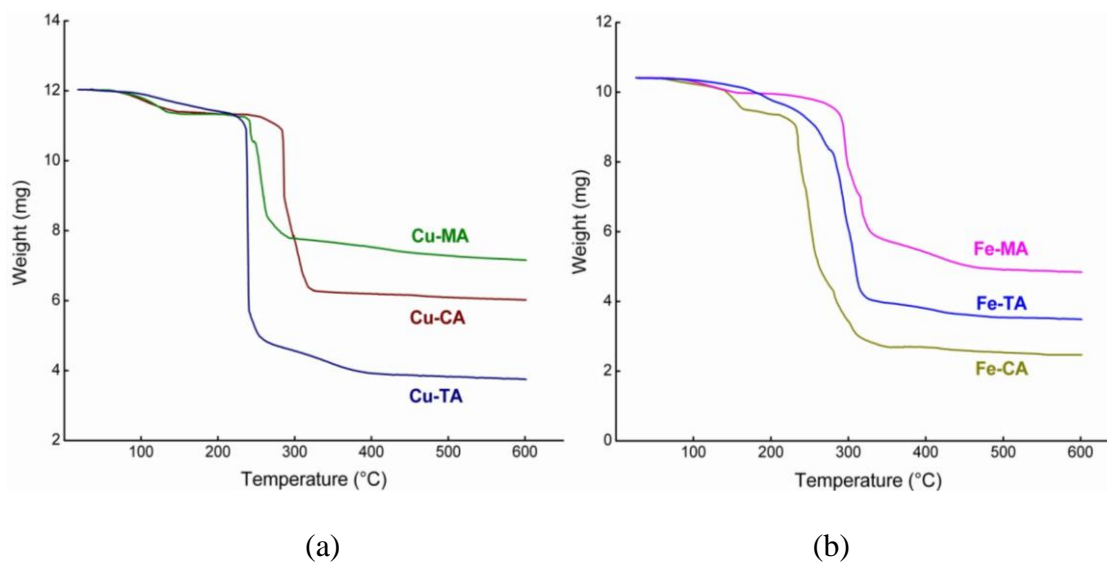

**Fig. S2** TGA spectra: (a) cupric complexes; (b) ferric complexes

**Table S2** Weight loss of hydroacid complexes in TGA measurements

| Sample | Decomposition stage  | Observed weight loss (%) | Calculated weight loss (%) |
|--------|----------------------|--------------------------|----------------------------|
| Cu-CA  | I (H <sub>2</sub> O) | 5.9                      | 5.7                        |
|        | II (organic ligand)  | 50.9                     | 49.4                       |
| Cu-MA  | I (H <sub>2</sub> O) | 7.8                      | 7.6                        |
|        | II (organic ligand)  | 46.9                     | 45.4                       |
| Cu-TA  | organic ligand       | 65.2                     | 62.4                       |
| Fe-CA  | I (H <sub>2</sub> O) | 6.4                      | 6.2                        |
|        | II (organic ligand)  | 56.0                     | 53.5                       |
| Fe-MA  | I (H <sub>2</sub> O) | 4.2                      | 4.4                        |
|        | II (organic ligand)  | 55.1                     | 52.8                       |
| Fe-TA  | organic ligand       | 61.1                     | 58.7                       |

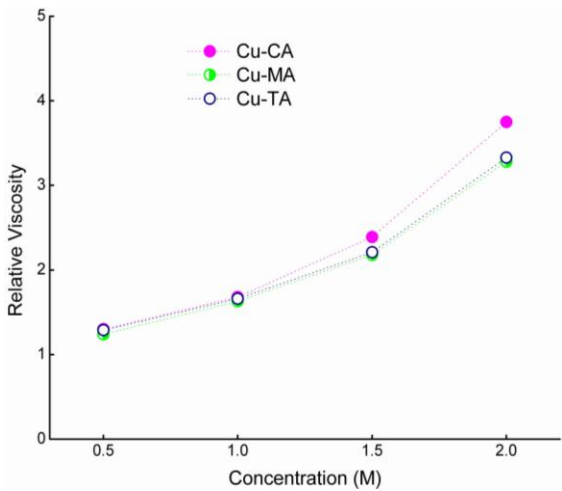

(a)

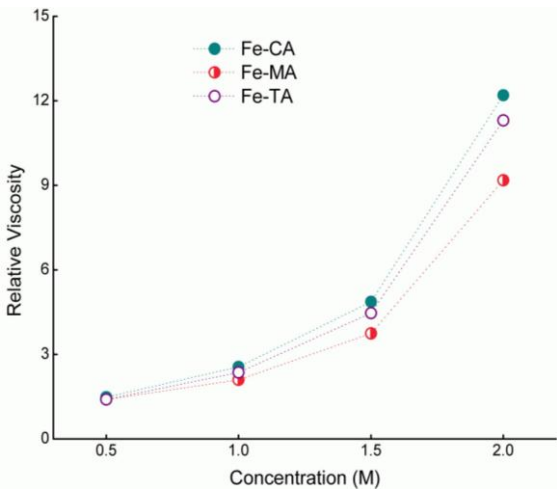

(b)

**Fig. S3** Relative viscosity comparison of (a) cupric complexes; (b) ferric complexes

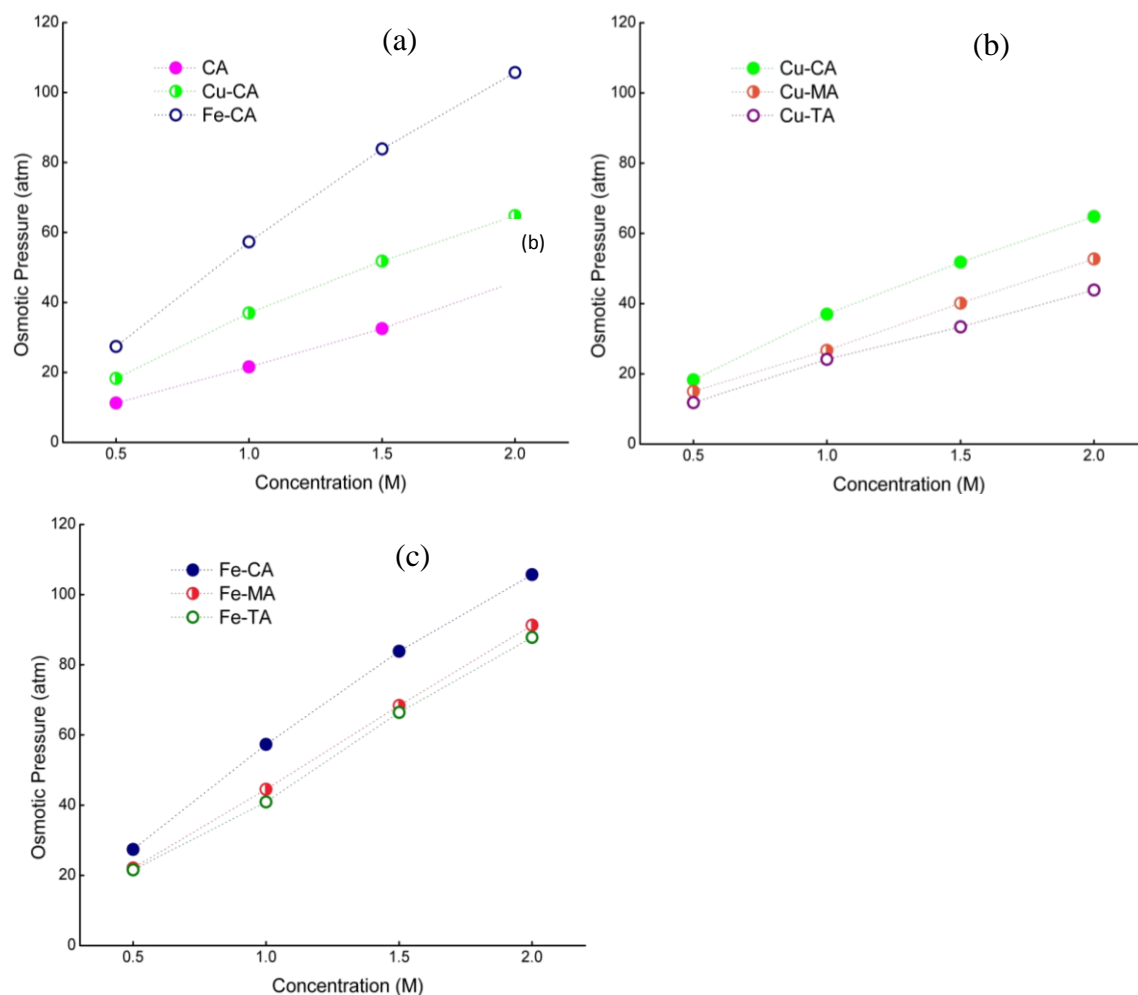

**Fig. S4** Osmotic pressure comparison of (a) CA and its complexes; (b) cupric complexes; (c) ferric complexes

## References

- 1 K. Y. Wang, R. C. Ong and T. S. Chung, *Ind. Eng. Chem. Res.*, 2010, **49**, 4824.
- 2 J. C. Su, Q. Yang, J. F. Teo and T. S. Chung, *J. Membr. Sci.*, 2010, **355**, 36.
- 3 J. C. Su and T. S. Chung, *J. Membr. Sci.*, 2011, **376**, 214.
